# Supplementary material for: The reliability and quality analysis of health information about Helicobacter pylori on WeChat official accounts
Source: PeerJ. 2026 Jan 27;14:e20543. doi: 10.7717/peerj.20543 (PMC12857560; doi:10.7717/peerj.20543)
Supplement: Supplemental Information 1 [file peerj-14-20543-s001.xlsx]

## Sheet: Sheet1
TIME	SOURCE	COVERAGE	JAMA	mDISCERN	GQS
20240703	enterprise	symptoms,infection,treatment	3	4	3
20240522	enterprise	examination,symptoms,treatment,recrudescence	3	4	5
20220505	enterprise	treatment	2	2	3
20220425	enterprise	treatment	3	3	3
20231013	institution	infection,treatment,recrudescence	3	4	4
20220418	enterprise	recrudescence,treatment	2	3	3
20240505	individual	treatment	2	1	2
20220124	institution	symptoms,infection,examination,treatment,prevention	4	5	5
20220609	enterprise	infection,prevention	2	4	2
20230718	institution	prevention,symptoms	2	2	2
20240109	individual	treatment,symptoms	2	1	2
20230601	enterprise	prevention,treatment	3	3	3
20240614	enterprise	symptoms,examination	2	2	2
20240319	enterprise	treatment	2	2	3
20230703	institution	infection	1	2	2
20220126	institution	infection,symptoms,examination	3	3	3
20220529	individual	prevention,symptoms	1	1	1
20220323	enterprise	examination	3	4	3
20220106	enterprise	infection,symptoms,examination,treatment,prevention	2	4	5
20220928	enterprise	infection,examination,prevention,treatment	3	4	5
20240620	enterprise	infection,symptoms,prevention	2	3	3
20220822	enterprise	infection,symptoms,prevention	1	2	3
20220407	institution	treatment	1	3	2
20230509	institution	examination	1	2	2
20220602	enterprise	symptoms,examination	3	2	3
20220926	individual	infection,prevention,examination	2	3	4
20220105	institution	prevention	2	2	2
20220123	enterprise	infection,symptoms,examination,prevention	2	3	4
20220208	enterprise	infection	1	3	2
20231014	enterprise	treatment	1	1	1
20220112	institution	prevention,treatment,symptoms	4	5	4
20231231	institution	treatment	3	3	2
20230315	non-profit organization	infection,symptoms,examination,treatment,prevention	4	5	5
20220401	enterprise	examination	2	4	3
20220114	enterprise	caution,examination,treatment	2	3	3
20220223	institution	treatment,examination	4	3	3
20230818	institution	infection,examination,symptoms,treatment,prevention	4	5	5
20221126	enterprise	recrudescence	2	4	3
20230605	non-profit organization	symptoms	1	3	2
20240508	enterprise	symptoms,treatment	3	4	3
20240411	enterprise	treatment	1	3	2
20220905	enterprise	prevention	1	3	3
20220107	institution	examination,treatment	2	2	2
20240703	institution	infection	3	4	2
20240117	enterprise	symptoms,treatment	3	4	4
20240422	institution	infection,treatment,prevention	2	3	4
20240619	enterprise	infection,treatment,examination	3	4	4
20220105	individual	treatment	2	1	1
20240416	non-profit organization	symptoms,examination,treatment	3	5	5
20240107	enterprise	infection,examination,prevention	3	5	5
20230327	enterprise	treatment	1	4	2
20220111	institution	infection,examination	4	4	4
20220516	institution	symptoms,examination,treatment,infection	3	5	5
20240418	enterprise	infection,treatment,examination,prevention	2	2	3
20240510	enterprise	treatment	2	2	1
20230412	institution	treatment	2	3	3
20230216	institution	infection,symptoms,examination,prevention	4	4	5
20230719	institution	treatment,prevention	2	3	2
20220121	institution	infection,symptoms	2	3	3
20220530	enterprise	symptoms	2	1	1
20230914	institution	examination,symptoms,prevention	3	5	5
20240619	enterprise	symptoms,infection,prevention	1	3	3
20231101	enterprise	treatment	2	3	4
20240414	enterprise	infection,symptoms	2	3	3
20230721	institution	prevention,symptoms	2	2	2
20220106	enterprise	infection,treatment	3	4	4
20230708	institution	symptoms,infection,treatment,prevention	1	3	4
20221201	enterprise	infection,symptoms,treatment,prevention	1	2	2
20231231	institution	treatment	1	2	2
20230406	individual	treatment	1	1	1
20220413	enterprise	treatment	2	4	4
20220424	enterprise	recrudescence	2	3	3
20230322	institution	treatment,prevention	3	5	5
20230915	institution	infection,treatment,examination,recrudescence	3	5	5
20221008	enterprise	prevention,treatment	2	4	3
20220106	enterprise	symptoms,treatment,prevention	3	5	4
20240315	enterprise	treatment,examination	2	3	3
20220411	enterprise	infection,examination,teatment	3	5	5
20220514	enterprise	infection,symptoms,examination,treatment,prevention	2	4	5
20220924	non-profit organization	treatment,prevention	2	5	4
20240223	individual	prevention	1	5	3
20220105	enterprise	infection,treatment,recrudescence,examination	2	1	2
20230105	enterprise	symptoms,examination	3	2	2
20230106	enterprise	treatment	4	5	3
20220407	enterprise	treatment	2	4	3
20221019	enterprise	symptoms,infection,recrudescence,prevention	3	4	4
20230416	individual	prevention	1	1	1
20240103	enterprise	infection,prevention	3	5	3
20230513	non-profit organization	treatment	3	5	3
20230831	enterprise	symptoms,prevention,examination,treatment,infection	1	4	4
20220122	individual	symptoms,treatment,prevention	1	1	2
20230925	institution	symptoms,infection,examination,treatment,recrudescence,prevention	2	5	5
20230717	institution	examination,treatment,recrudescence,prevention	3	4	4
20220718	enterprise	infection	2	4	2
20240103	individual	infection,prevention	1	1	1
20231107	enterprise	symptoms,prevention	4	5	4
20220330	individual	infection	1	1	1
20220120	institution	infection,symptoms,examination,treatment,prevention	1	4	4
20230404	institution	symptoms	2	3	2
20231203	institution	infection,prevention	3	5	4
20230602	enterprise	treatment	2	5	3
20220510	enterprise	symptoms,infection,prevention	2	3	4
20220812	institution	symptoms,examination,treatment,prevention	1	4	4
20230726	institution	symptoms,prevention,examination,treatment	2	4	4
20230111	enterprise	treatment	2	4	3
20220506	individual	treatment	1	1	1
20220407	enterprise	infection,symptoms,prevention	2	1	1
20220713	individual	prevention	1	1	1
20240527	enterprise	infection,treatment	3	5	4
20230728	individual	treatment	1	1	1
20220224	institution	treatment	2	3	2
20240329	institution	infection,symptoms,examination,treatment,recrudescence,prevention	4	5	5
20231020	enterprise	treatment,recrudescence	2	5	4
20231218	institution	treatment	2	4	2
20240701	individual	infection,treatment	1	3	3
			2	3	3
				3
